# Supplementary material
Source: publisher site journal article supplement (https://www.dovepress.com/article/326728)
Supplement: Supplementary file 1 [file get_supplementary_file.php]

**Mask Mandates and COVID-19 Related Symptoms in the US**

**Appendix A**

| **Table A1** Representative Check | | | |
| --- | --- | --- | --- |
|  | Sample (%) | National (%) | Difference |
| (1) | (2) | (3) |
| Male | 48.3 | 48.4 | -0.1 |
| Female | 51.7 | 51.6 | +0.1 |
| Age 18 - 44 | 45.9 | 46.0 | -0.1 |
| Age 45+ | 54.1 | 54.0 | +0.1 |
| High School Graduate | 28.3 | 28.3 | 0.0 |
| College Attended | 27.7 | 27.8 | -0.1 |
| Non-Hispanic Black | 11.9 | 11.8 | +0.1 |
| Hispanic | 16.6 | 16.5 | +0.1 |
| Other Minorities | 8.6 | 8.6 | 0.0 |
| **Note**: National statistics are from Census CPS 2019. Sampling weights are used in computing these statistics for both data. | | | |

| **Table A2** The Relationship between Symptoms and COVID-19 Infection | | | | | | |
| --- | --- | --- | --- | --- | --- | --- |
|  | Fever  or Chills | Cough | Shortness  of Breath | Fatigue | Muscle or  Body Aches | Headache |
|  | (1) | (2) | (3) | (4) | (5) | (6) |
| Positivity Rate | 0.1938*** | 0.0782*** | 0.0125*** | 0.0678** | 0.1386*** | 0.0572** |
|  | (0.0359) | (0.0287) | (0.0019) | (0.0284) | (0.0281) | (0.0292) |
|  |  |  |  |  |  |  |
| Observations | 19,290 | 19,290 | 19,290 | 19,290 | 19,290 | 19,290 |
| **Note**: *p < 0.1, **p < 0.05, ***p < 0.01. Robust standard errors are clustered at the Statistical Area-by-Week level. Sampling weights are used since the unweighted estimates may be biased in the presence of endogenous sampling. | | | | | | |

| **Table A3** The Relationship between Symptoms and COVID-19 Infection (continued) | | | | | |
| --- | --- | --- | --- | --- | --- |
|  | Loss of  Appetite | Sore  Throat | Congestion or  Runny Nose | Nausea or  Vomiting | Diarrhea |
|  | (1) | (2) | (3) | (4) | (5) |
| Positivity Rate | 0.1215*** | 0.0600** | 0.0183*** | 0.0203*** | 0.0883*** |
|  | (0.0273) | (0.0285) | (0.0069) | (0.0052) | (0.0272) |
|  |  |  |  |  |  |
| Observations | 19,290 | 19,290 | 19,290 | 19,290 | 19,290 |
| **Note**: *p < 0.1, **p < 0.05, ***p < 0.01. Robust standard errors are clustered at the Statistical Area-by-Week level. Sampling weights are used since the unweighted estimates may be biased in the presence of endogenous sampling. | | | | | |

| **Table A4** Summary statistics | | | | | | | | | | | |
| --- | --- | --- | --- | --- | --- | --- | --- | --- | --- | --- | --- |
|  | Control | | |  | Treatment | | |  | All | | |
| Mean | SD | Obs. |  | Mean | SD | Obs. |  | Mean | SD | Obs. |
| (1) | (2) | (3) |  | (4) | (5) | (6) |  | (7) | (8) | (9) |
| **Panel A: Independent Variables** | | | | | | | | | | | |
| Being Male | 0.431 | 0.495 | 19,262 |  | 0.417 | 0.493 | 3,973 |  | 0.429 | 0.495 | 23,235 |
| Having Bachelor’s Degree | 0.518 | 0.500 | 19,271 |  | 0.599 | 0.490 | 3,976 |  | 0.532 | 0.499 | 23,247 |
| Being Non-white | 0.289 | 0.454 | 16,574 |  | 0.245 | 0.430 | 3,969 |  | 0.281 | 0.449 | 20,543 |
| Living in Urban Areas | 0.767 | 0.423 | 19,271 |  | 0.866 | 0.341 | 3,976 |  | 0.784 | 0.411 | 23,247 |
| Household Size | 2.475 | 1.615 | 19,271 |  | 2.285 | 1.373 | 3,976 |  | 2.443 | 1.578 | 23,247 |
| Share of Children (<18) | 0.111 | 0.209 | 19,271 |  | 0.095 | 0.192 | 3,976 |  | 0.108 | 0.207 | 23,247 |
| Age 18-29 | 0.128 | 0.334 | 19,268 |  | 0.125 | 0.331 | 3,976 |  | 0.128 | 0.334 | 23,244 |
| Age 30-44 | 0.249 | 0.433 | 19,268 |  | 0.229 | 0.420 | 3,976 |  | 0.246 | 0.430 | 23,244 |
| Age 45-59 | 0.236 | 0.424 | 19,268 |  | 0.246 | 0.431 | 3,976 |  | 0.237 | 0.426 | 23,244 |
| Age 60+ | 0.387 | 0.487 | 19,268 |  | 0.400 | 0.490 | 3,976 |  | 0.389 | 0.488 | 23,244 |
|  |  |  |  |  |  |  |  |  |  |  |  |
| **Panel B: Outcome Variables** | | | | | | | | | | | |
| Number of Symptoms | 1.526 | 1.797 | 19,271 |  | 1.458 | 1.791 | 3,976 |  | 1.514 | 1.796 | 23,247 |
| Log(1 + # of Symptoms) | 0.703 | 0.660 | 19,271 |  | 0.672 | 0.658 | 3,976 |  | 0.697 | 0.659 | 23,247 |
| Any Symptoms | 0.602 | 0.490 | 19,271 |  | 0.581 | 0.493 | 3,976 |  | 0.598 | 0.490 | 23,247 |
| Six or More Symptoms | 0.037 | 0.190 | 19,271 |  | 0.038 | 0.191 | 3,976 |  | 0.038 | 0.190 | 23,247 |
| All Symptoms | 0.001 | 0.028 | 19,271 |  | 0.000 | 0.016 | 3,976 |  | 0.001 | 0.026 | 23,247 |
| Fever or Chills | 0.225 | 0.418 | 19,271 |  | 0.217 | 0.412 | 3,976 |  | 0.224 | 0.417 | 23,247 |
| Cough | 0.127 | 0.333 | 19,271 |  | 0.123 | 0.328 | 3,976 |  | 0.126 | 0.332 | 23,247 |
| Shortness of Breath | 0.115 | 0.319 | 19,271 |  | 0.108 | 0.310 | 3,976 |  | 0.114 | 0.318 | 23,247 |
| Fatigue | 0.121 | 0.326 | 19,271 |  | 0.112 | 0.316 | 3,976 |  | 0.119 | 0.324 | 23,247 |
| Muscle or Body Aches | 0.120 | 0.325 | 19,271 |  | 0.121 | 0.326 | 3,976 |  | 0.120 | 0.325 | 23,247 |
| Headache | 0.127 | 0.333 | 19,271 |  | 0.125 | 0.331 | 3,976 |  | 0.127 | 0.333 | 23,247 |
| Loss of Appetite | 0.111 | 0.314 | 19,271 |  | 0.107 | 0.310 | 3,976 |  | 0.111 | 0.314 | 23,247 |
| Sore Throat | 0.126 | 0.332 | 19,271 |  | 0.118 | 0.323 | 3,976 |  | 0.125 | 0.331 | 23,247 |
| Congestion or Runny Nose | 0.217 | 0.412 | 19,271 |  | 0.208 | 0.406 | 3,976 |  | 0.215 | 0.411 | 23,247 |
| Nausea or Vomitting | 0.121 | 0.326 | 19,271 |  | 0.109 | 0.312 | 3,976 |  | 0.119 | 0.324 | 23,247 |
| Diarrhea | 0.115 | 0.320 | 19,271 |  | 0.109 | 0.312 | 3,976 |  | 0.114 | 0.318 | 23,247 |
